# Supplementary material for: A multi-level security model for partitioning workflows over federated clouds
Source: Springer Nature journal article supplement (doi:10.1186/2192-113x-1-15), 2012-01-01
Supplement: 13677_2012_18_MOESM1_ESM.pdf [file 13677_2012_18_MOESM1_ESM.pdf]

# Patient Data

A. Smith  
378456729

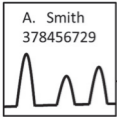

$d_0$

Anonymize

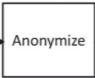

$s_1$

# Heart Rate Data

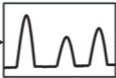

$d_2$

Analyze

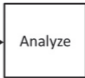

$s_3$

# Results

$p = 30\%$   
 $q = 27.4$   
 $r = 34$

$d_4$
