# Supplementary material for: A multi-level security model for partitioning workflows over federated clouds
Source: Springer Nature journal article supplement (doi:10.1186/2192-113x-1-15), 2012-01-01
Supplement: 13677_2012_18_MOESM7_ESM.pdf [file 13677_2012_18_MOESM7_ESM.pdf]

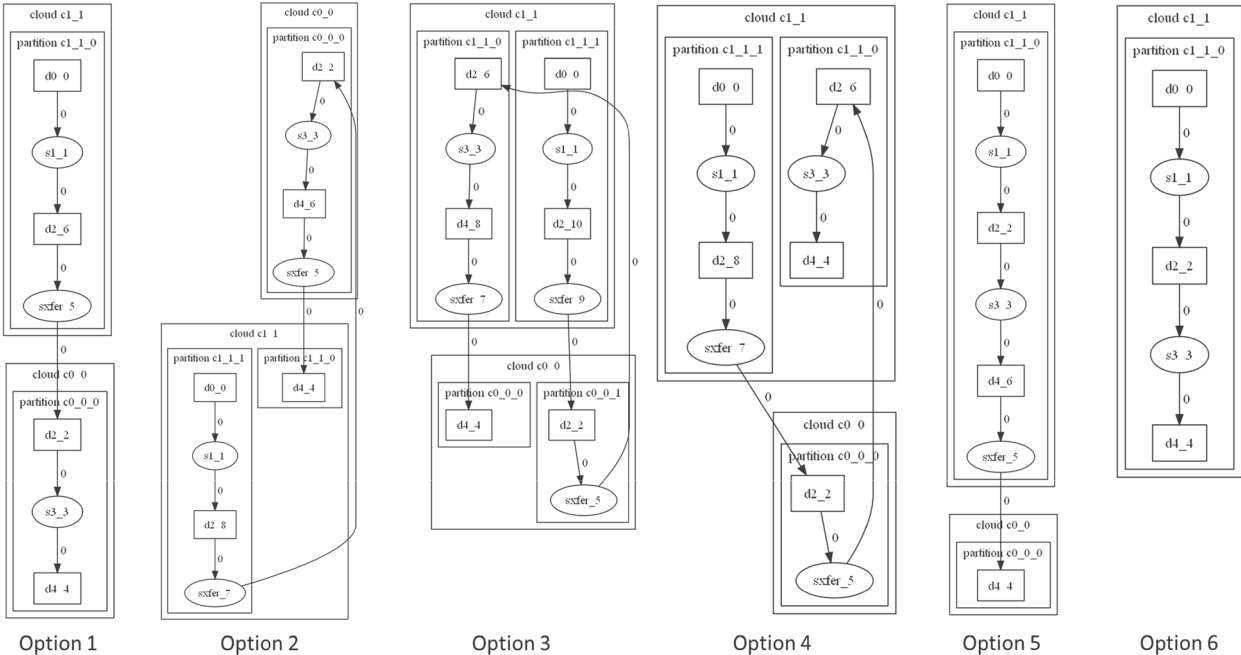

Option 1

Option 2

Option 3

Option 4

Option 5

Option 6
