# Supplementary material for: A multi-level security model for partitioning workflows over federated clouds
Source: Springer Nature journal article supplement (doi:10.1186/2192-113x-1-15), 2012-01-01
Supplement: 13677_2012_18_MOESM12_ESM.pdf [file 13677_2012_18_MOESM12_ESM.pdf]

# e-Science Central

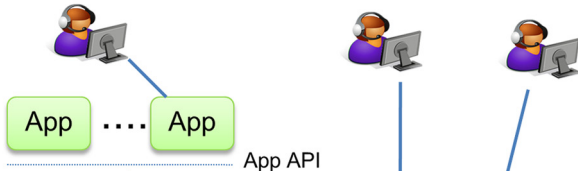

Security 

Cloud Platform

Workflow Enactment

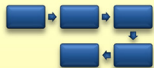

Social Networking

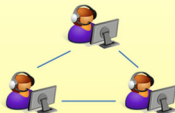

Provenance/  
Audit

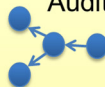

Analysis Services

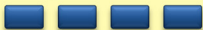

Metadata

```
<expt>9127</expt>  
<smiles>CHC3</smiles>
```

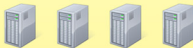

Processing

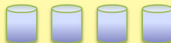

Storage

Cloud Infrastructure
